# Supplementary material
Source: PubMed Central journal article supplement (PMC2923236)

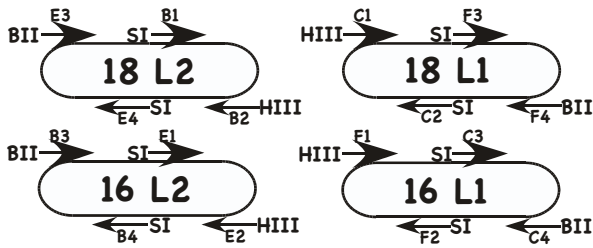

**9. LIGATED BII AND HIII DIGESTED  
pHPV18L1/L2Δ WITH EACH OF  
THE FOLLOWING SETS OF CAPSID ORFs**

1. PCR AMPLIFY
2. ISOLATE L2 AND L1 AMPLIMERS
3. DIGEST AMPLIMERS WITH BII, HIII AND SI

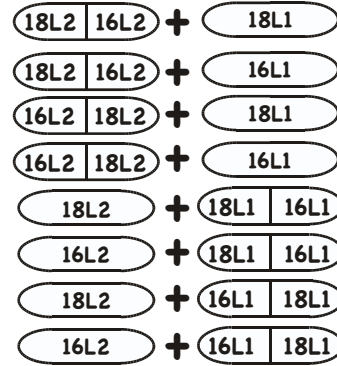

4. pGL2 VECTOR DIGESTED  
WITH BII AND HIII

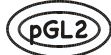

5. LIGATED DIGESTED pGL2 VECTOR  
WITH PAIRED AMPLIFIED  
CAPSID SEQUENCES

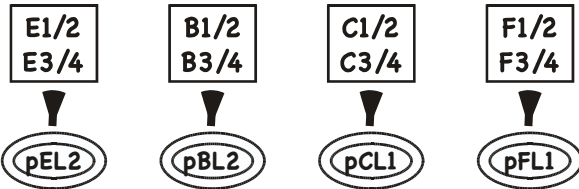

6. DIGESTED WITH BII AND HIII  
TO RELEASE CHIMERIC CAPSID ORFs

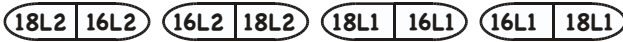

7. DIGESTED pHPV18L1/L2Δ  
WITH BII AND HIII

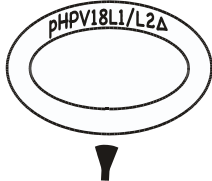

8. DIGESTED HPV18-L2(18)L1(18)

WITH BII AND HIII TO RELEASE  
NONOVERLAPPING L2/L1 ORF

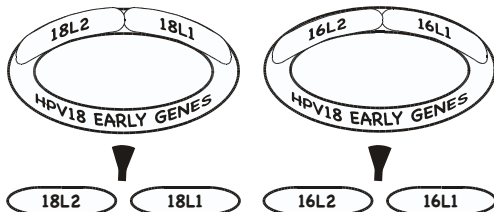

**10. FINAL CHIMERIC VIRAL GENOMES**

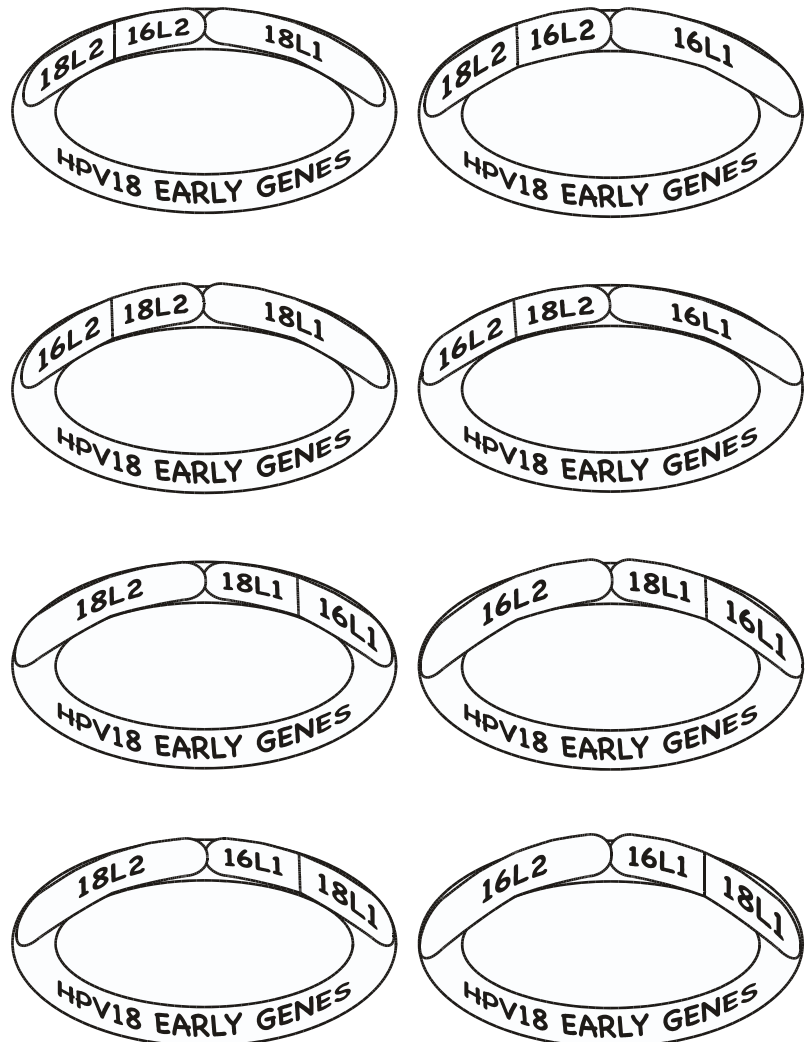

Supplement: NIHMS211346-supplement-02.pdf [file NIHMS211346-supplement-02.pdf]
