# Supplementary material
Source: PubMed Central journal article supplement (PMC2923236)

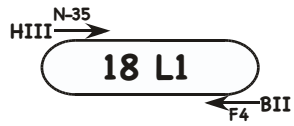

1. PCR AMPLIFY

2. ISOLATE PCR-AMPLIFIED L1 FRAGMENT LACKING THE N-TERMINAL 105 nt.

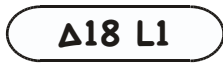

3. DIGESTED WITH HIII AND BII.

4. DIGESTED pHPV18L1/L2Δ WITH BII AND HIII

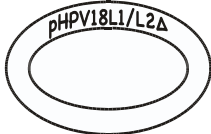

5. LIGATED BII AND HIII DIGESTED pHPV18L1/L2Δ WITH EACH OF THE FOLLOWING SETS OF CAPSID ORFs

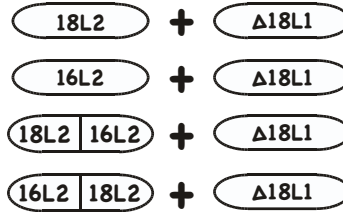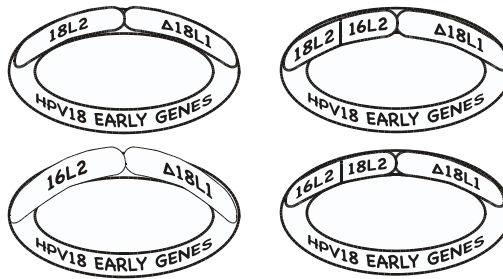

Supplement: NIHMS211346-supplement-04.pdf [file NIHMS211346-supplement-04.pdf]
