# Supplementary material
Source: PubMed Central journal article supplement (PMC2923236)

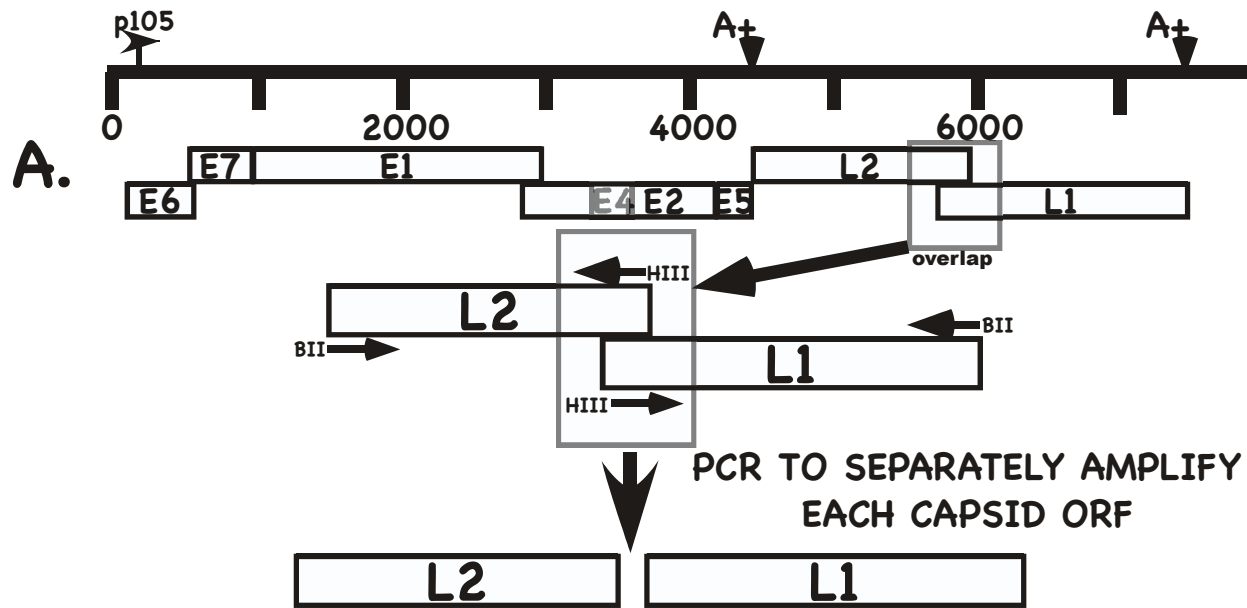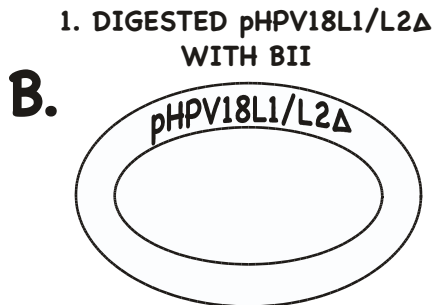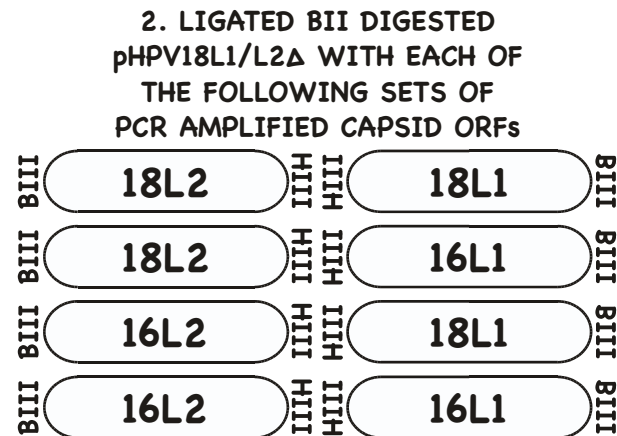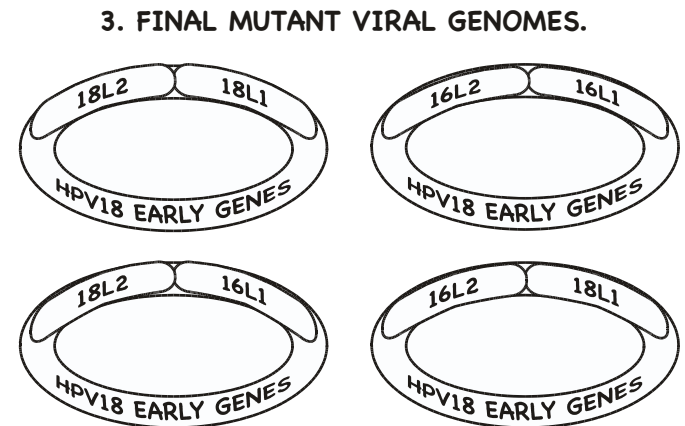

Supplement: NIHMS211346-supplement-01.pdf [file NIHMS211346-supplement-01.pdf]

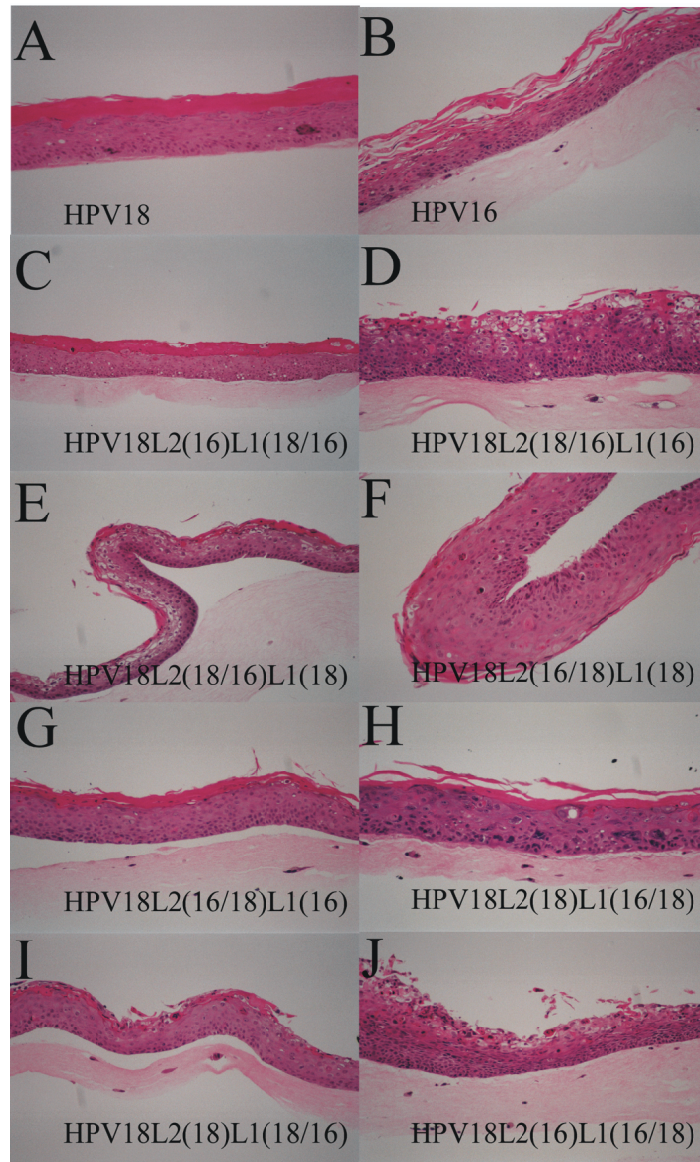

Supplement: NIHMS211346-supplement-03.pdf [file NIHMS211346-supplement-03.pdf]
